# Supplementary material for: BRAF/NRAS wild-type melanoma, NF1 status and sensitivity to trametinib
Source: PubMed Central journal article supplement (PMC4296225; doi:10.1111/pcmr.12316), 2014-10-13
Supplement: pcmr0028-0117-sd3.pdf [file pcmr0028-0117-sd3.pdf]

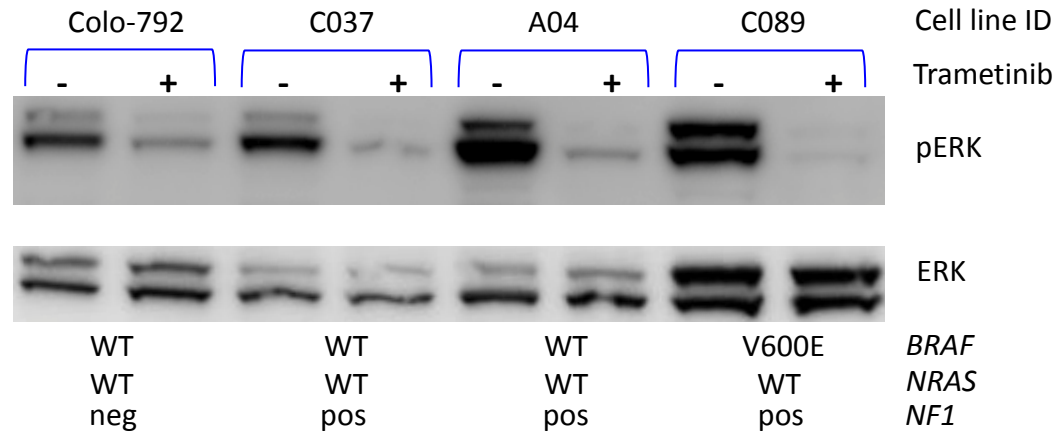

**Supplementary Figure 3. Trametinib induced p-ERK downregulation in melanoma cell lines independent of their *BRAF/NRAS* and *NF1* status.** Treatment with trametinib 5nM for 6h induces downregulated p-ERK in *BRAF/NRAS* wild type *NF1* positive cell lines, and in controls.
